# Supplementary material for: Counteranion-dependent mechanochromism of a photoluminescent platinum(ii) complex with mixed terpyridine and thioglucose
Source: Royal Society of Chemistry journal article supplement (doi:10.1039/c4cc06775d), 2014-09-15
Supplement: c4cc06775d2.pdf [file c4cc06775d2.pdf]

## **ELECTRONIC SUPPORTING INFORMATION (ESI)**

for

Counteranion-dependent mechanochromism of a photoluminescent  
platinum(II) complex with mixed terpyridine and thioglucose

Naoki Kitani, Naoto Kuwamura, Toshiaki Tsukuda, Nobuto Yoshinari and Takumi Konno\*

## Preparation of complexes.

**[Pt(H<sub>4</sub>tg-S)(terpy)]ClO<sub>4</sub> ([1]ClO<sub>4</sub>).** To an orange solution containing [PtCl(terpy)]Cl·2H<sub>2</sub>O<sup>1</sup> (0.20 g, 0.37 mmol) in 40 mL of water was added a solid sample of KH<sub>4</sub>tg·H<sub>2</sub>O<sup>2</sup> (0.11 g, 0.41 mmol). The mixture was stirred at room temperature for 10 min, which gave a red solution. To the red solution was added a 1.0 M NaClO<sub>4</sub> aqueous solution (5 mL), followed by allowing it to stand at room temperature for 4 days. The resulting orange fiber crystals were collected by filtration. Yield: 0.25 g (87%). Anal. Calcd for [Pt(H<sub>4</sub>tg)(terpy)]ClO<sub>4</sub>·2H<sub>2</sub>O ([1]ClO<sub>4</sub>·2H<sub>2</sub>O = C<sub>21</sub>H<sub>22</sub>N<sub>3</sub>ClO<sub>9</sub>PtS): C, 33.23; H, 3.45; N, 5.54%. Found: C, 33.29; H, 3.37; N, 5.58%. <sup>1</sup>H NMR (D<sub>2</sub>O): δ 9.11 (2H, d, *J* = 5.6 Hz), 8.31 (1H, t, *J* = 8.2 Hz), 8.26 (2H, td, *J* = 7.8, 1.5 Hz), 8.13 (2H, d, *J* = 8.8 Hz), 8.09 (2H, d, *J* = 7.6 Hz), 7.71-7.68 (2H, m), 4.42 (1H, d, *J* = 8.8 Hz), 3.71 (1H, dd, *J* = 12.1, 1.3 Hz), 3.51 (1H, dd, *J* = 12.2, 5.4 Hz), 3.33-3.26 (4H, m). IR (cm<sup>-1</sup>): 625, 1090 (ν(ClO<sub>4</sub><sup>-</sup>)). Orange needle crystals suitable for X-ray analysis were obtained by the recrystallization of the fiber crystals from hot water.

**[Pt(H<sub>4</sub>tg-S)(terpy)]PF<sub>6</sub> ([1]PF<sub>6</sub>).** This complex-salt was obtained as orange fiber crystals by a method similar to that for [1]ClO<sub>4</sub>, using a 1.0 M NH<sub>4</sub>PF<sub>6</sub> aqueous solution instead of a 1.0 M NaClO<sub>4</sub> aqueous solution. Yield: 0.25 g (85%). Anal. Calcd for [Pt(H<sub>4</sub>tg)(terpy)]PF<sub>6</sub>·1.5H<sub>2</sub>O ([1]PF<sub>6</sub>·1.5H<sub>2</sub>O = C<sub>21</sub>H<sub>25</sub>F<sub>6</sub>N<sub>3</sub>O<sub>6.5</sub>PPtS) : C, 31.71; H, 3.17; N, 5.28%. Found: C, 31.57; H, 3.12; N, 5.34%. IR (cm<sup>-1</sup>): 560, 842 (ν(PF<sub>6</sub><sup>-</sup>)). Orange needle crystals suitable for X-ray analysis were obtained by allowing the remaining filtrate to stand at room temperature.

## Measurements.

The electronic absorption spectra were recorded with a JASCO V-660 spectrophotometer at room temperature. The IR spectra were recorded on a JASCO FT/IR-4100 infrared spectrometer using KBr disks at room temperature. The luminescent spectra were recorded on a JASCO FP-6600 spectrometer in solid state at room temperature. The light shorter than 370 nm was removed by using a glass filter. The emission spectra in the solid state were recorded by scanning 10 times with a rate

of 500 nm /min. The solid state emission spectrum was accumulated for 10 times scan. The internal quantum yields were measured by the absolute method using a spectrofluorometer (Jasco FP-8500) with a fluorescence integrating sphere unit (Jasco ILFC-847) at an excitation wavelength of 340 nm using a Xe lamp as the light source, and the data were corrected using both deuterium and halogen lamps. The elemental analyses (C, H, N) were performed with Yanaco CHN Corder MT-5. The  $^1\text{H}$  NMR spectra were recorded with a JEOL GSX400 spectrometer in  $\text{D}_2\text{O}$ . Sodium 4,4'-dimethyl-4-silapentane-1-sulfonate (DSS) was used as the internal standard. The molar conductivities were measured with a HORIBA DS12 conductivity meter. The powder X-ray diffraction measurement experiments were performed on a Bruker D2 PHASER.

### **X-ray crystallography.**

Single-crystal X-ray diffraction measurements for  $[\mathbf{1}]\text{ClO}_4$  were performed on a Rigaku RAXIS RAPID imaging plate and Vari-Max with graphite monochromated  $\text{Mo-K}\alpha$  radiation ( $\lambda = 0.71075 \text{ \AA}$ ) at 200 K. The measurements for  $[\mathbf{1}]\text{PF}_6$  were performed on a Rigaku R-Axis VII imaging plate and Vari-Max with graphite monochromated  $\text{Mo-K}\alpha$  radiation ( $\lambda = 0.71075 \text{ \AA}$ ) at 200 K. The intensity data were collected by the  $\omega$ -scan technique and empirically corrected for absorption. The structures of the complexes were solved by direct methods using SHELXS97.<sup>3</sup> The structure refinements were carried out using full matrix least-squares (SHELXL-97).<sup>3</sup> Because of the quite thin needle-like shape of  $[\mathbf{1}]\text{ClO}_4$  ( $0.25 \times 0.03 \times 0.01 \text{ mm}^3$ ) and  $[\mathbf{1}]\text{PF}_6$  ( $0.15 \times 0.01 \times 0.01 \text{ mm}^3$ ), the X-ray absorption corrections were not effectively made. Thus, only heavy atoms were refined anisotropically (Pt, S, Cl, and O for  $[\mathbf{1}]\text{ClO}_4$  and Pt, S, and P for  $[\mathbf{1}]\text{PF}_6$ ), and others were refined by using isotropic models. Hydrogen atoms were placed at calculated positions. All structural parameters are summarized in the Tables S2-S4.

### **Computational details.**

The electronic structures were calculated by using Gaussian09 software.<sup>4</sup> The density functional theory (DFT) and the time-dependent DFT (TD-DFT) calculations were performed by using the B3LYP function with Lanl2dz basis sets on Pt atom, 6-31G\* basis sets on N, S atoms, and 6-31G basis sets on C, H, O atoms.<sup>5</sup> All of the geometries were taken directly from the single-crystal structure coordinates; a single-point calculation was performed on each asymmetric unit.

## References.

1. (a) S. E. Hobert, J. T. Carney and S. D. Cummings, *Inorganica Chimica Acta*, 2001, **318**, 89; (b) J. X. McDermott, J. F. White and G. M. Whitesides, *J. Am. Chem. Soc.* 1976, **98**, 6521; (c) D. P. Gamblin, P. Garnier, S. Kasteren, N. J. Oldham, A. J. Fairbanks and B. G. Davis, *Angew. Chem. Int. Ed.* 2004, **43**, 828; (d) J. Ella-Menye, X. Nie and G. Wang, *Carbohydrate Research*, 2008, **343**, 1743; (e) G. J. L. Bernardes, E. J. Grayson, S. Thompson, J. M. Chalker, J. C. Errey, F. E. Oualid, T. D. W. Claridge and B. G. Davis, *Angew. Chem. Int. Ed.* 2008, **47**, 2244.
2. N. Yoshinari, N. Kitani and T. Konno, *Acta Crystallogr.* 2012, **C68**, m363.
3. Sheldrick, G. M. *Acta Crystallogr.* 2008, **A64**, 112.
4. Gaussian 09, Revision **A.1**, M. J. Frisch, G. W. Trucks, H. B. Schlegel, G. E. Scuseria, M. A. Robb, J. R. Cheeseman, G. Scalmani, V. Barone, B. Mennucci, G. A. Petersson, H. Nakatsuji, M. Caricato, X. Li, H. P. Hratchian, A. F. Izmaylov, J. Bloino, G. Zheng, J. L. Sonnenberg, M. Hada, M. Ehara, K. Toyota, R. Fukuda, J. Hasegawa, M. Ishida, T. Nakajima, Y. Honda, O. Kitao, H. Nakai, T. Vreven, J. A. Montgomery, Jr., J. E. Peralta, F. Ogliaro, M. Bearpark, J. J. Heyd, E. Brothers, K. N. Kudin, V. N. Staroverov, R. Kobayashi, J. Normand, K. Raghavachari, A. Rendell, J. C. Burant, S. S. Iyengar, J. Tomasi, M. Cossi, N. Rega, J. M. Millam, M. Klene, J. E. Knox, J. B. Cross, V. Bakken, C. Adamo, J. Jaramillo, R. Gomperts, R. E. Stratmann, O. Yazyev, A. J. Austin, R. Cammi, C. Pomelli, J. W. Ochterski, R. L. Martin, K. Morokuma, V. G. Zakrzewski, G. A. Voth, P. Salvador, J. J. Dannenberg, S. Dapprich, A. D. Daniels, O. Farkas, J. B. Foresman, J. V. Ortiz, J. Cioslowski and D. J. Fox, Gaussian, Inc., Wallingford CT, 2009.
5. (a) A. D. Becke, *Phys. Rev. A* 1988, **38**, 3098; (b) A. D. Becke, *J. Chem. Phys.* 1993, **98**, 5648; (c) C. Lee, W. Yang and R. G. Parr, *Phys. Rev. B* 1988, **37**, 785.

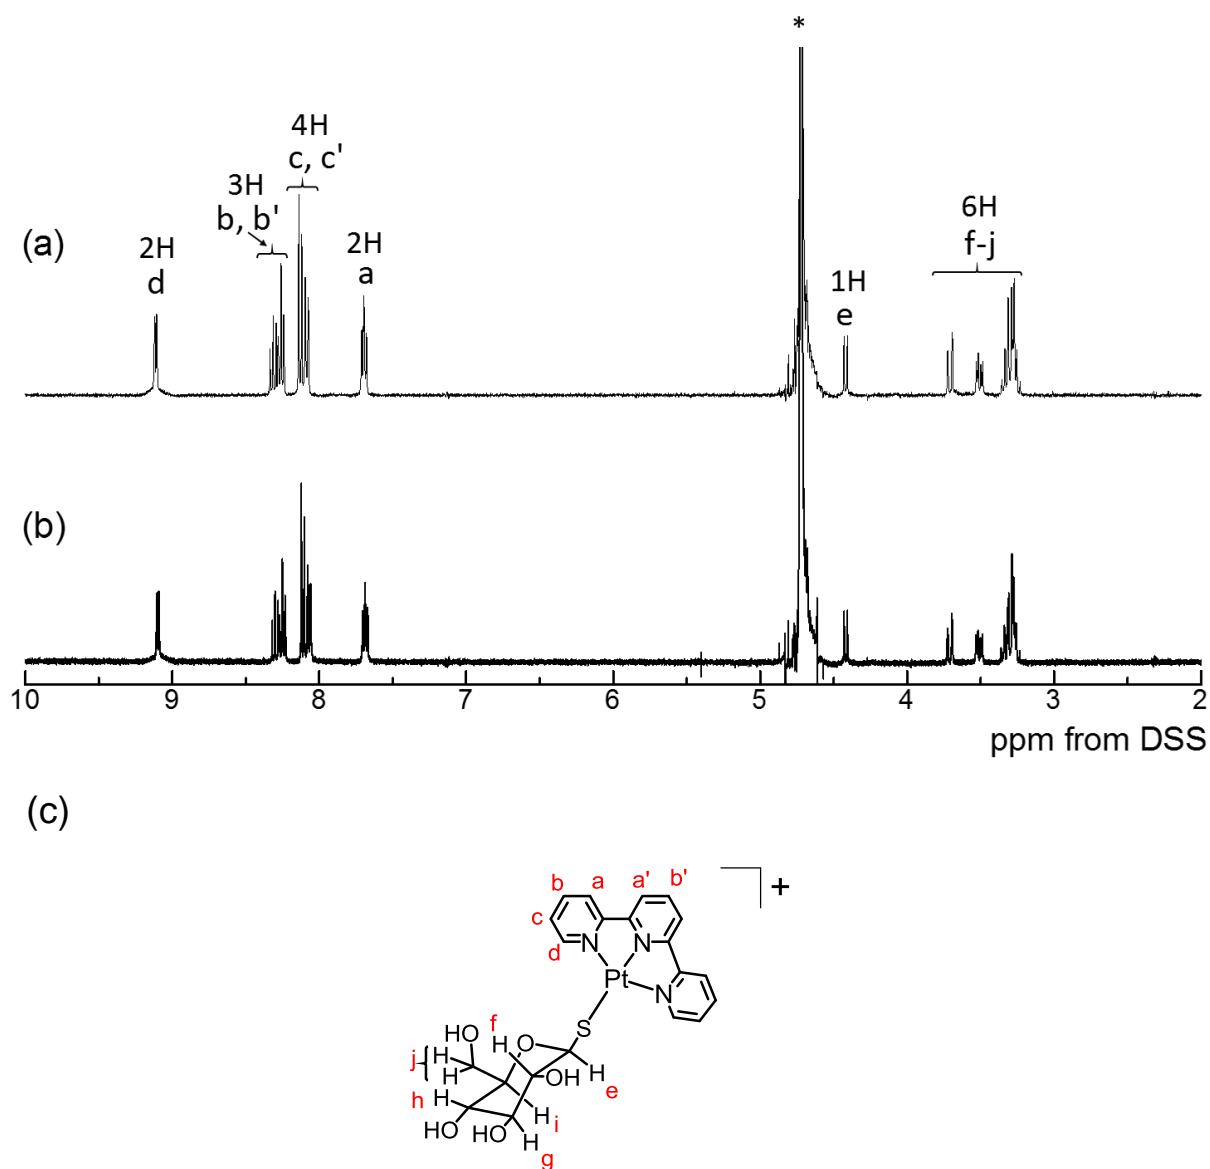

**Fig. S1.**  $^1\text{H}$  NMR spectra of (a)  $[\mathbf{1}]\text{ClO}_4$  and (b)  $[\mathbf{1}]\text{PF}_6$  in  $\text{D}_2\text{O}$ . (\*) indicates the signal from  $\text{H}_2\text{O}$ . (c) Drawing of the structure of  $[\mathbf{1}]^+$ .

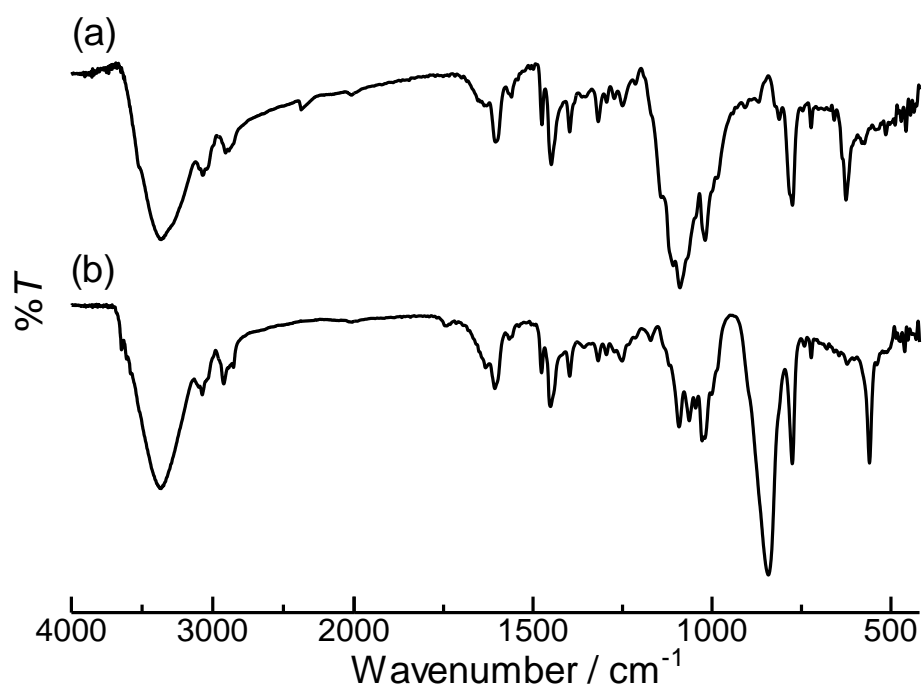

**Fig. S2.** IR spectra of (a) [1]ClO<sub>4</sub> and (b) [1]PF<sub>6</sub>.

(a)

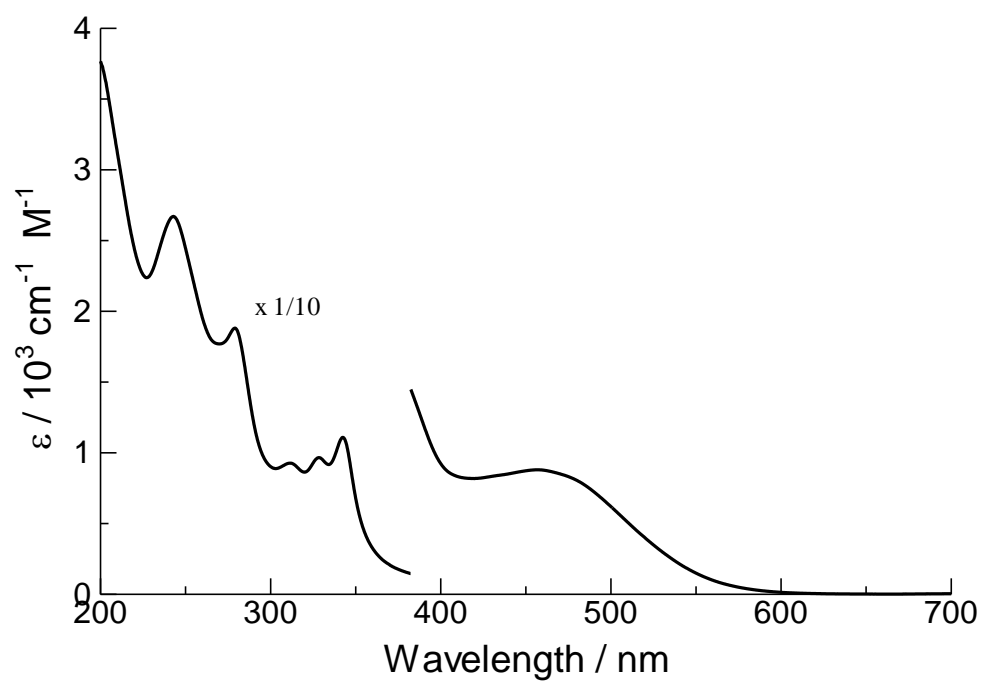

(b)

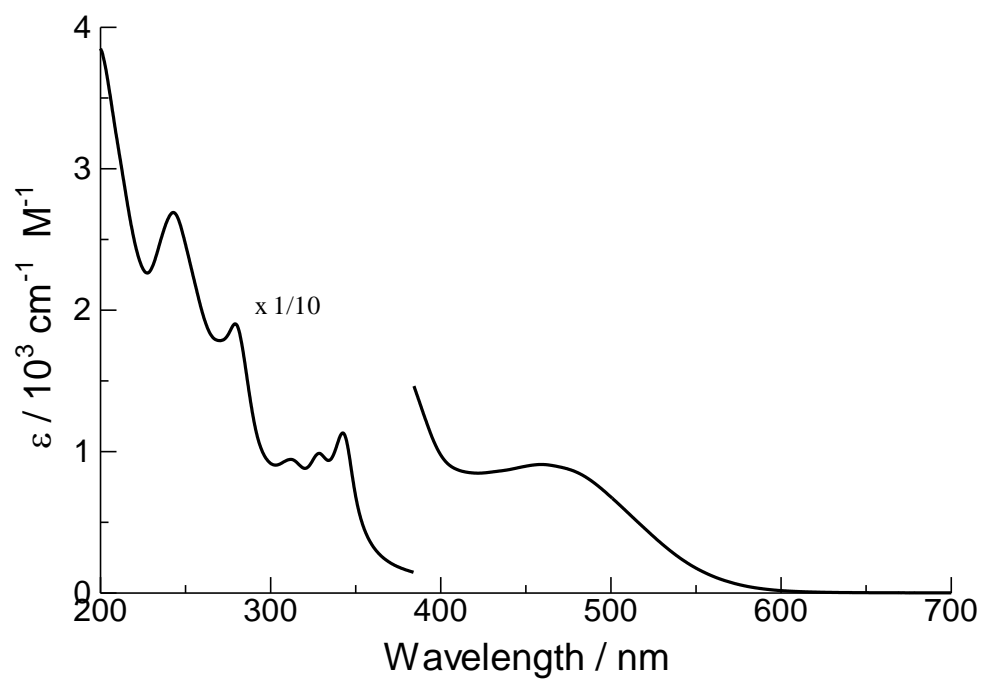

**Fig. S3.** Electronic absorption spectrum of (a) [1]ClO<sub>4</sub> and (b) [1]PF<sub>6</sub> in H<sub>2</sub>O.



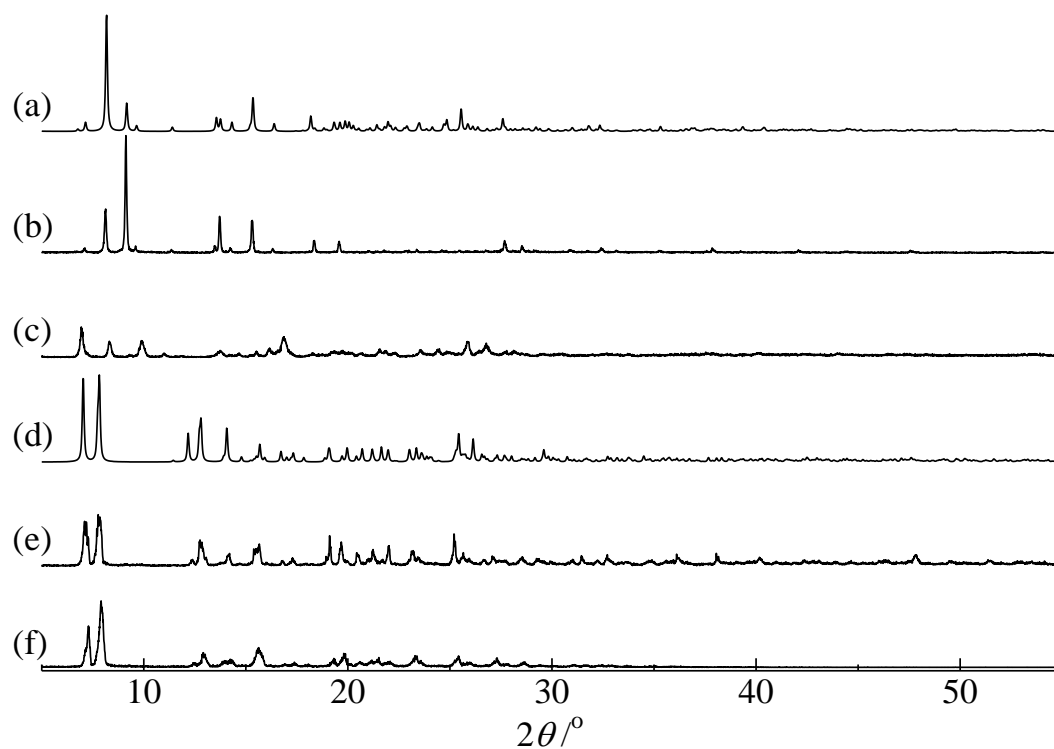

**Fig. S4.** Powder X-ray diffraction spectra of [1]ClO<sub>4</sub> (a) simulated based on the single-crystal X-ray analytical data, (b) before grinding and (c) after grinding. Powder X-ray diffraction spectra of [1]PF<sub>6</sub> (d) simulated based on the single-crystal X-ray analytical data, (e) before grinding and (f) after grinding.

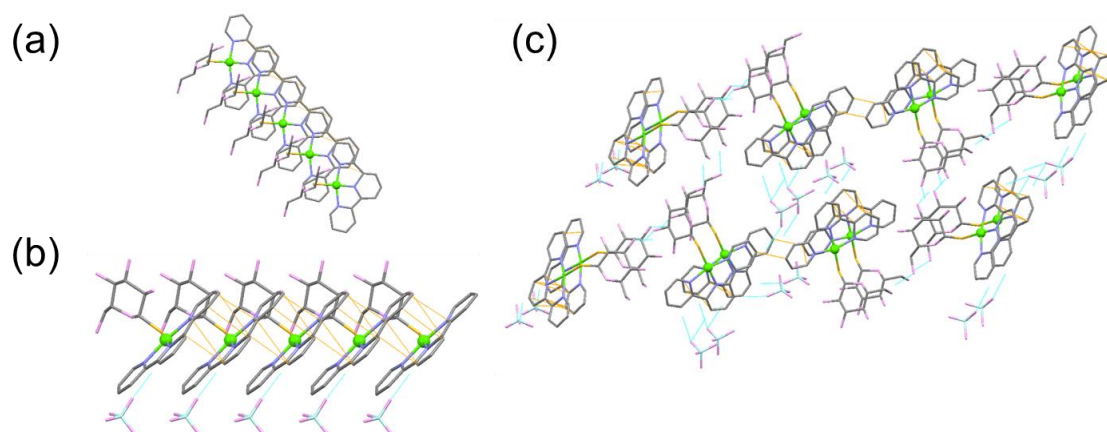

**Fig. S5.** (a) Top and (b) side views of the 1D chain structure and (c) the 3D packing structure in  $[1]\text{ClO}_4 \cdot 2\text{H}_2\text{O}$ . Orange and blue dotted lines indicate the  $\pi$ - $\pi$  and hydrogen bonding interactions, respectively. H atoms are omitted for clarity. Pt: light green, S: yellow, Cl: pale blue, O: pink N: blue, C: gray.

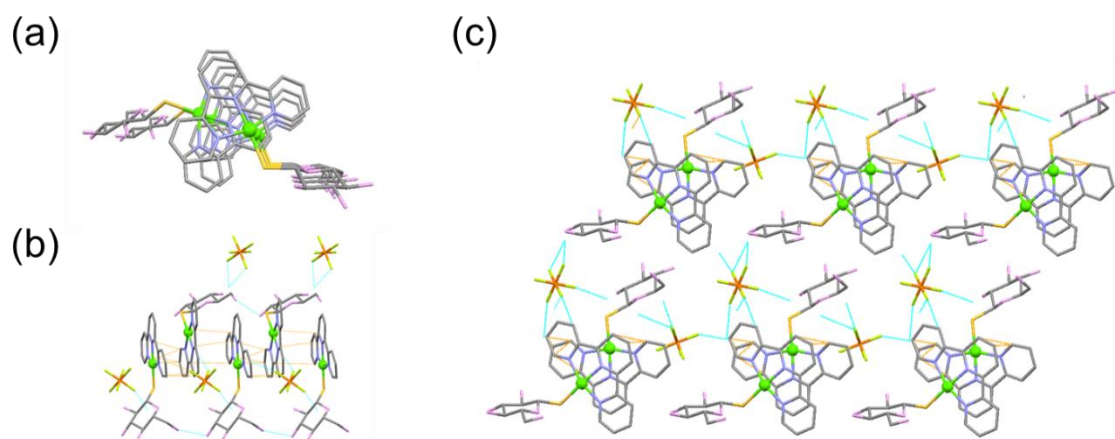

**Fig. S6.** (a) Top and (b) side views of the 1D chain structure and (c) the 3D packing structure in  $[1]\text{PF}_6 \cdot 1.5\text{H}_2\text{O}$ . Orange and blue dotted lines indicate the  $\pi$ - $\pi$  and hydrogen bonding interactions, respectively. H atoms are omitted for clarity. Pt: light green, S: yellow, P: orange, F: olive green, O: pink N: blue, C: gray.

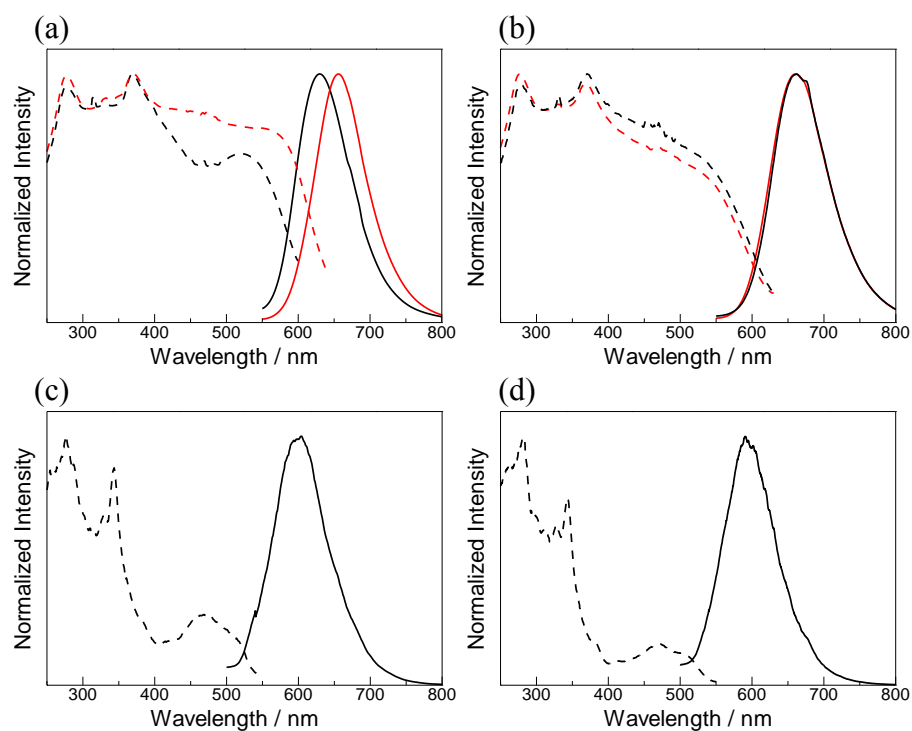

**Fig. S7.** Emission and excitation spectra of (a) [1]ClO<sub>4</sub> and (b) [1]PF<sub>6</sub> in the solid state at room temperature before grinding (black line) and after grinding (red line). Emission and excitation spectra of (c) [1]ClO<sub>4</sub> and (d) [1]PF<sub>6</sub> in H<sub>2</sub>O/EtOH at 77 K. Excitation wavelength is 340 nm.

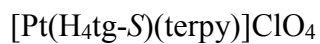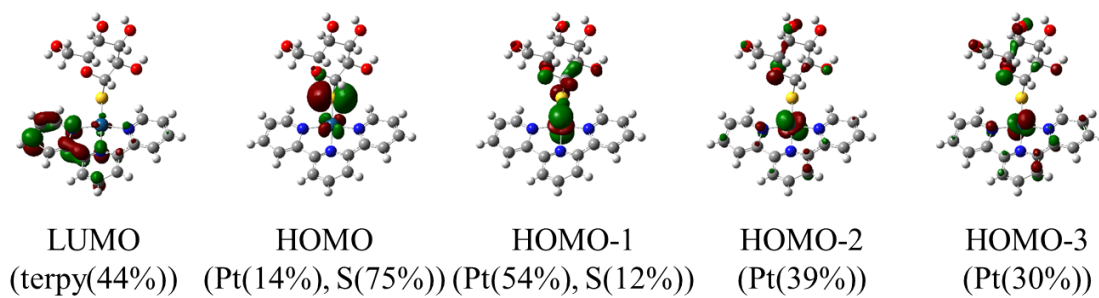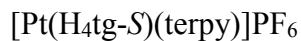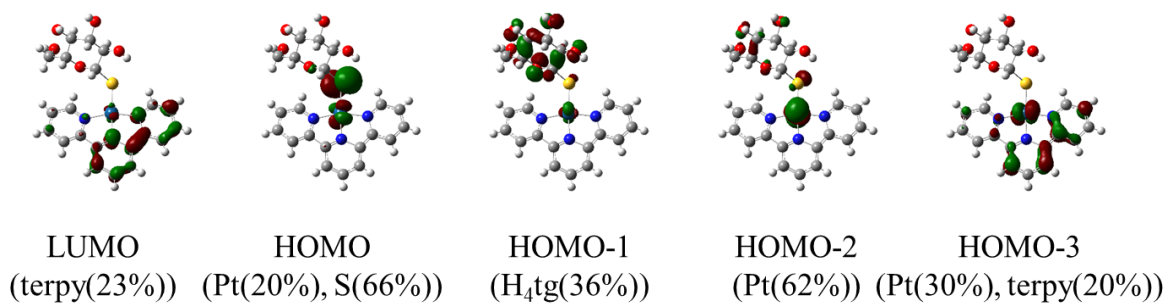

**Fig. S8.** The contour plots of molecular orbitals of the complex cations in **[1]**ClO<sub>4</sub> and **[1]**PF<sub>6</sub>. The surfaces are drawn at 0.05 a.u. level.

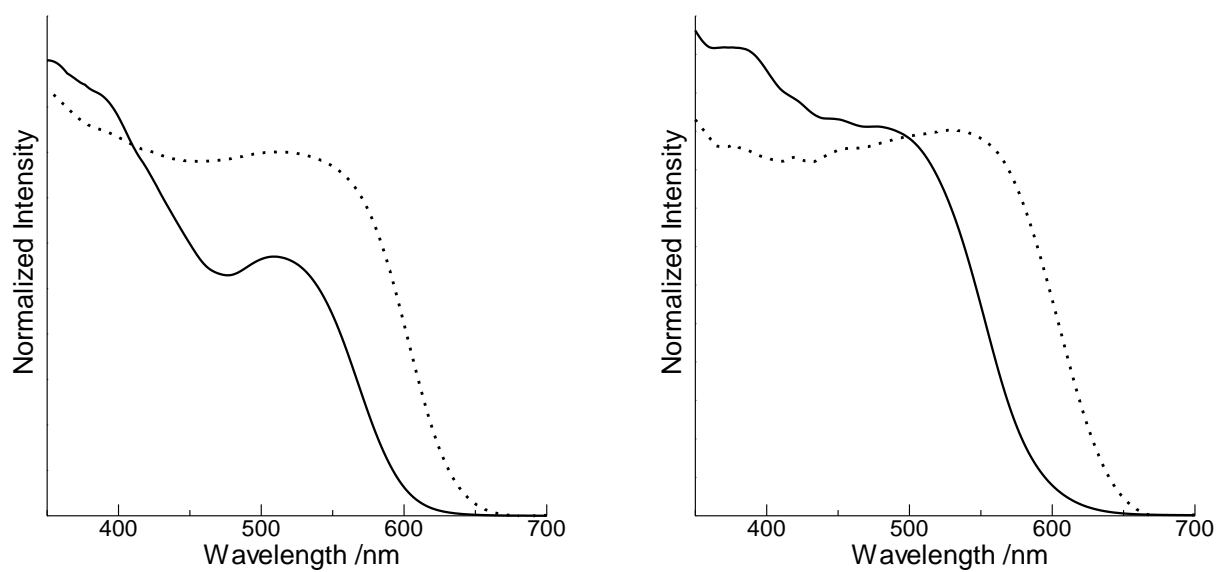

**Fig. S9.** Diffuse reflection spectra of [1]ClO<sub>4</sub> (left) and [1]PF<sub>6</sub> (right) in the solid state before grinding (solid line) and after grinding (dashed line).

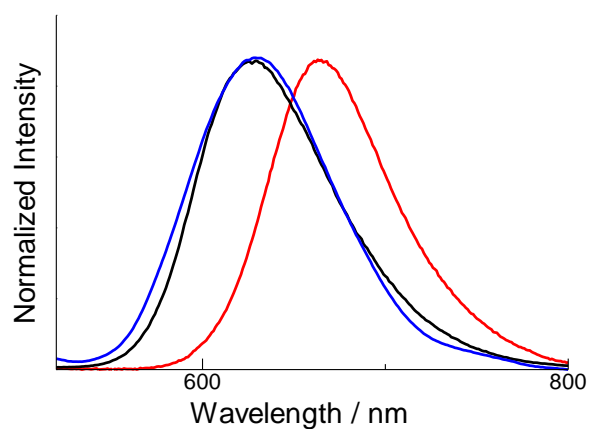

**Fig. S10.** Emission spectra of [1]ClO<sub>4</sub> in the solid state before grinding (black line), after grinding (red line), and after recrystallization (blue line). Excitation wavelength is 340 nm.

**Table S1.** Electronic absorption spectral data of [1]ClO<sub>4</sub> in water.

| $\lambda_{\text{max}}$ / nm ( $\varepsilon$ / $10^3 \text{ cm}^{-1} \text{ M}^{-1}$ ) |
|---------------------------------------------------------------------------------------|
| 456.6 (0.8802)                                                                        |
| 341.8 (11.06)                                                                         |
| 328.2 (9.663)                                                                         |
| 311.0 (9.267)                                                                         |
| 279.0 (18.81)                                                                         |
| 242.4 (26.69)                                                                         |

**Table S2.** Crystallographic data of complexes.

|                                                                          | [1]ClO <sub>4</sub> ·2H <sub>2</sub> O                               | [1]PF <sub>6</sub> ·1.5H <sub>2</sub> O                                             |
|--------------------------------------------------------------------------|----------------------------------------------------------------------|-------------------------------------------------------------------------------------|
| Chemical formula                                                         | C <sub>21</sub> H <sub>26</sub> ClN <sub>3</sub> O <sub>11</sub> PtS | C <sub>21</sub> H <sub>25</sub> F <sub>6</sub> N <sub>3</sub> O <sub>6.5</sub> PPtS |
| Formula weight ( <i>M</i> )                                              | 759.05                                                               | 795.56                                                                              |
| Crystal system                                                           | Monoclinic                                                           | Triclinic                                                                           |
| Space group                                                              | <i>P</i> 2 <sub>1</sub>                                              | <i>P</i> 1                                                                          |
| <i>a</i> / Å                                                             | 4.9262(11)                                                           | 7.9715(3)                                                                           |
| <i>b</i> / Å                                                             | 38.578(9)                                                            | 13.0562(4)                                                                          |
| <i>c</i> / Å                                                             | 13.082(4)                                                            | 14.1600(5)                                                                          |
| $\alpha$ / °                                                             | 90                                                                   | 63.162(5)                                                                           |
| $\beta$ / °                                                              | 94.038(8)                                                            | 89.461(7)                                                                           |
| $\gamma$ / °                                                             | 90                                                                   | 77.050(6)                                                                           |
| <i>V</i> / Å <sup>3</sup>                                                | 2479.9(10)                                                           | 1274.4(1)                                                                           |
| <i>Z</i>                                                                 | 4                                                                    | 2                                                                                   |
| <i>T</i> / K                                                             | 200(2)                                                               | 200(2)                                                                              |
| <i>R</i> (int)                                                           | 0.1765                                                               | 0.0593                                                                              |
| <i>D</i> <sub>calcd</sub> / g cm <sup>-3</sup>                           | 2.033                                                                | 2.073                                                                               |
| $\mu$ (Mo K $\alpha$ ), mm <sup>-1</sup>                                 | 51.97                                                                | 57.184                                                                              |
| $\theta_{\text{Max}}$ / °                                                | 27.48                                                                | 27.50                                                                               |
| Miller index ranges                                                      | $-6 \leq h \leq 6$<br>$-49 \leq k \leq 49$<br>$-16 \leq l \leq 16$   | $-10 \leq h \leq 10$<br>$-16 \leq k \leq 16$<br>$-17 \leq l \leq 18$                |
| Reflections collected                                                    | 22898                                                                | 14747                                                                               |
| Refinement method                                                        | Full-matrix least-square on <i>F</i> <sup>2</sup>                    | Full-matrix least-square on <i>F</i> <sup>2</sup>                                   |
| Data / restraints / Parameters                                           | 11010 / 7 / 447                                                      | 9887 / 3 / 349                                                                      |
| Flack                                                                    | 0.0018(16)                                                           | 0.003(13)                                                                           |
| <i>R</i> <sub>1</sub> ( <i>I</i> > 2 $\sigma$ ( <i>I</i> )) <sup>a</sup> | 0.1332                                                               | 0.0748                                                                              |
| w <i>R</i> <sub>2</sub> <sup>b</sup>                                     | 0.2876                                                               | 0.1897                                                                              |
| Goodness-of-fit on <i>F</i> <sup>2</sup>                                 | 1.123                                                                | 1.140                                                                               |
| Treatment of hydrogen atoms                                              | constr                                                               | constr                                                                              |
| CCDC number                                                              | 1005469                                                              | 1005470                                                                             |

$$^a R_1 = \Sigma(|F_o| - |F_c|) / \Sigma(|F_o|). \quad ^b wR_2 = [\Sigma w(F_o^2 - F_c^2)^2 / \Sigma w(F_o^2)^2]^{1/2}.$$

**Table S3.** Selected bond distances and angles of [1]ClO<sub>4</sub>·2H<sub>2</sub>O.

| Bond distances (Å) |           |                  |           |
|--------------------|-----------|------------------|-----------|
| Pt(1)-N(1)         | 2.11(3)   | Pt(2)-N(4)       | 1.97(2)   |
| Pt(1)-N(2)         | 1.89(2)   | Pt(2)-N(5)       | 2.08(3)   |
| Pt(1)-N(3)         | 2.08(3)   | Pt(2)-N(6)       | 2.03(3)   |
| Pt(1)-S(1)         | 2.326(7)  | Pt(2)-S(2)       | 2.304(9)  |
| Bond angles (°)    |           |                  |           |
| N(1)-Pt(1)-N(2)    | 84.2(10)  | N(4)-Pt(2)-N(5)  | 79.6(11)  |
| N(1)-Pt(1)-N(3)    | 163.4(10) | N(4)-Pt(2)-N(6)  | 161.3(11) |
| N(2)-Pt(1)-N(3)    | 79.2(10)  | N(5)-Pt(2)-N(6)  | 81.8(11)  |
| N(1)-Pt(1)-S(1)    | 97.5(7)   | N(4)-Pt(2)-S(2)  | 101.5(8)  |
| N(2)-Pt(1)-S(1)    | 178.0(7)  | N(5)-Pt(2)-S(2)  | 173.6(7)  |
| N(3)-Pt(1)-S(1)    | 99.0(8)   | N(6)-Pt(2)-S(2)  | 97.1(9)   |
| C(1)-S(1)-Pt(1)    | 103.1(9)  | C(22)-S(2)-Pt(2) | 102.3(10) |



**Table S4.** Selected bond distances and angles of [1]PF<sub>6</sub>·1.5H<sub>2</sub>O.

| Bond distances (Å) |           |                  |           |
|--------------------|-----------|------------------|-----------|
| Pt(1)-N(1)         | 1.998(14) | Pt(2)-N(4)       | 2.013(19) |
| Pt(1)-N(2)         | 1.98(3)   | Pt(2)-N(5)       | 1.986(16) |
| Pt(1)-N(3)         | 2.032(14) | Pt(2)-N(6)       | 2.017(16) |
| Pt(1)-S(1)         | 2.294(7)  | Pt(2)-S(2)       | 2.281(4)  |
| Bond angles (°)    |           |                  |           |
| N(1)-Pt(1)- N(2)   | 81.3(7)   | N(4)-Pt(2)-N(5)  | 82.9(7)   |
| N(1)-Pt(1)- N(3)   | 163.3(8)  | N(4)-Pt(2)-N(6)  | 161.7(6)  |
| N(2)-Pt(1)-N(3)    | 81.9(8)   | N(5)-Pt(2)-N(6)  | 78.9(7)   |
| N(1)-Pt(1)-S(1)    | 96.9(6)   | N(4)-Pt(2)-S(2)  | 93.5(4)   |
| N(2)-Pt(1)-S(1)    | 176.2(5)  | N(5)-Pt(2)-S(2)  | 176.2(6)  |
| N(3)-Pt(1)-S(1)    | 99.8(6)   | N(6)-Pt(2)-S(2)  | 104.6(5)  |
| C(1)-S(1)-Pt(1)    | 108.1(7)  | C(22)-S(2)-Pt(2) | 112.5(5)  |

**Table S5.** Energy, oscillator strength and major contribution of calculated transitions for [1]ClO<sub>4</sub> and [1]PF<sub>6</sub>.

| Excited state       | Energy / eV ( / nm) | Oscillator strength | Major contributions                        |
|---------------------|---------------------|---------------------|--------------------------------------------|
| [1]ClO <sub>4</sub> |                     |                     |                                            |
| 1                   | 2.2226 (557.84)     | 0.0027              | HOMO → LUMO (99%)                          |
| 2                   | 2.7688 (447.79)     | 0.0009              | HOMO → LUMO+1 (99%)                        |
| 3                   | 3.0456 (407.10)     | 0.0034              | HOMO-1 → LUMO (80%)<br>HOMO-2 → LUMO (13%) |
| 4                   | 3.3131 (374.23)     | 0.0103              | HOMO-2 → LUMO (55%)<br>HOMO-3 → LUMO (30%) |
| [1]PF <sub>6</sub>  |                     |                     |                                            |
| 1                   | 2.3866 (519.51)     | 0.0547              | HOMO → LUMO (99%)                          |
| 2                   | 2.8682 (432.28)     | 0.0251              | HOMO → LUMO+1 (99%)                        |
| 3                   | 3.0892 (401.35)     | 0.0033              | HOMO-1 → LUMO (31%)<br>HOMO-2 → LUMO (58%) |
| 4                   | 3.3060 (375.03)     | 0.0170              | HOMO-3 → LUMO (81%)                        |
